# Supplementary material
Source: publisher site journal article supplement (https://www.dovepress.com/article/232073)

Supplementary table 1. ROC curve analysis of preoperative prognostic score versus other staging systems

|                        | AUC (95%CI)         | P      |
|------------------------|---------------------|--------|
| Prognostic score model | 0.696 (0.636-0.757) | <0.001 |
| TNM staging system     | 0.620 (0.555-0.685) | <0.001 |
| CLIP staging system    | 0.612 (0.547-0.677) | 0.001  |
| Qkuda staging system   | 0.553 (0.487-0.619) | 0.114  |
| BCLC staging system    | 0.619 (0.554-0.683) | <0.001 |

Supplementary figure 1. Predictive ability of the prognostic score was compared with common used staging system such as BCLC, TNM, CLIP and Qkuda staging systems by ROC curve analysis.

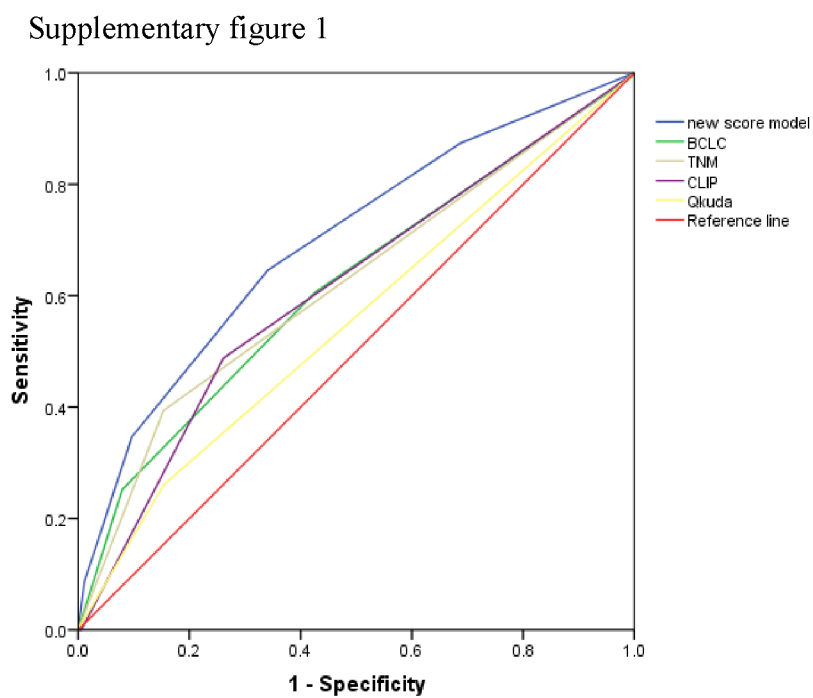

Supplement: Supplementary file 1 [file get_supplementary_file.php]
